# Supplementary material for: Layer-by-layer assembled magnetic molecularly imprinted nanoparticles for the highly specific recovery of luteolin from honeysuckle leaves
Source: Royal Society of Chemistry journal article supplement (doi:10.1039/d1gc00675d), 2021-01-01
Supplement: d1gc00675d1.pdf [file d1gc00675d1.pdf]

## Electronic supplementary information

### Layer-by-layer assembled magnetic molecularly imprinted nanoparticles for highly specific recovery of luteolin from honeysuckle leaves

Xuemeng Tian <sup>a</sup>, Ruixia Gao <sup>a,\*</sup>, Yue Wang <sup>a</sup>, Yulian He <sup>b</sup>, Sameer Hussain <sup>a</sup>, Jake  
Heinlein <sup>b</sup>, Jiahao Tian <sup>a</sup>, Lisa D. Pfefferle <sup>b</sup>, Xiaoshuang Tang <sup>c</sup>, Yuhai Tang <sup>a</sup>

<sup>a</sup> *School of Chemistry, Xi'an Jiaotong University, Xi'an, Shaanxi 710049, China*

<sup>b</sup> *Department of Chemical & Environmental Engineering, Yale University, New Haven,  
Connecticut 06520-8286, United States*

<sup>c</sup> *Department of Urology, The Second Affiliated Hospital of Xi'an Jiaotong University,  
Xi'an, Shaanxi 710061, China*

\* Corresponding author:

E-mail: ruixiagao@xjtu.edu.cn (R. Gao).

Tel: +86 29 82655399; fax: +86 29 82655399.

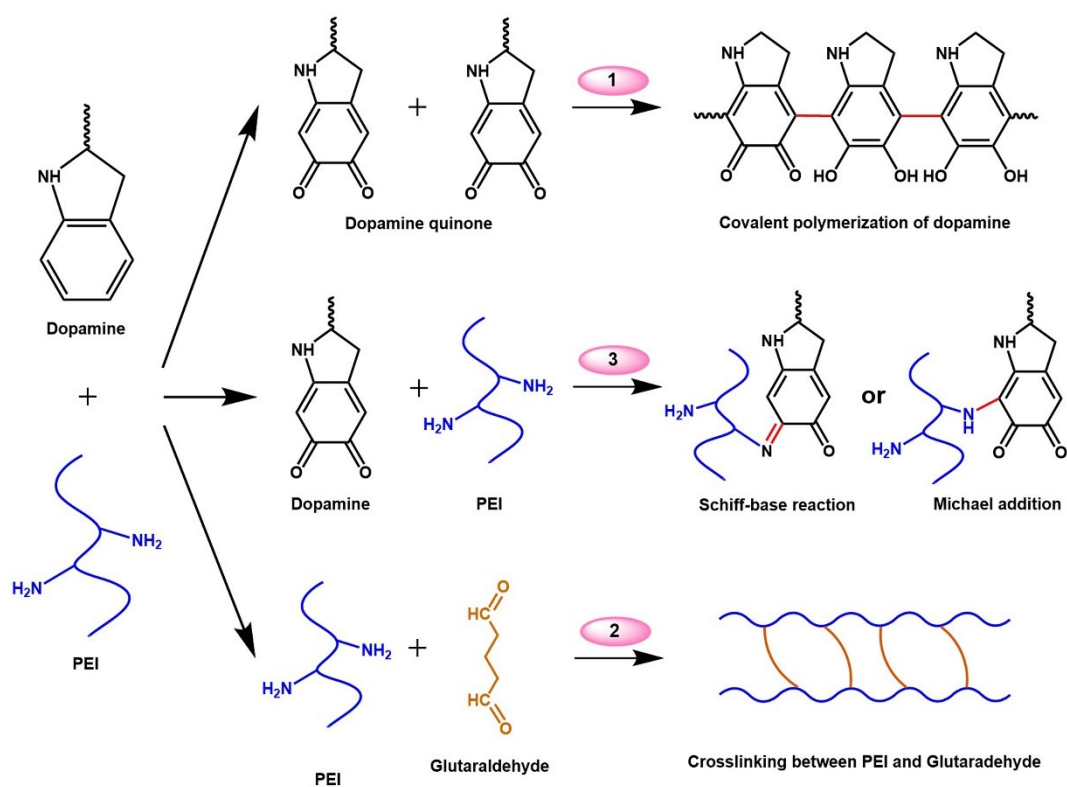

**Scheme S1** Possible reactions for the co-deposition of dopamine/PEI [1].

## The investigation of hydrogen bonding

The  $^1\text{H}$  NMR and FTIR were used to investigate the hydrogen bonding between LTL and DA.  $^1\text{H}$  NMR spectra of LTL, DA, and mixed LTL/DA in *d*-DMSO are presented in Fig. S1. The peak corresponding to N-H protons (a) in DA is located at  $\delta$  8.0<sup>2,3</sup>. It can be seen that the peak becomes broadened and a downfield shift to  $\delta$  8.8, attributing to the decrease in electron density around N-H protons resulting from the hydrogen-bonding complexation<sup>4</sup>. Similarly, the hydroxy protons (b) in LTL that appeared at  $\delta$  13.0 also becomes broadened, indicating hydrogen-bond formation between LTL and DA<sup>5</sup>. The results of  $^1\text{H}$  NMR spectra provide complementary proof that the hydrogen bonding could be formed between the amino groups of DA in  $\text{Fe}_3\text{O}_4$ -LTL-MIPs and hydroxyl groups of LTL.

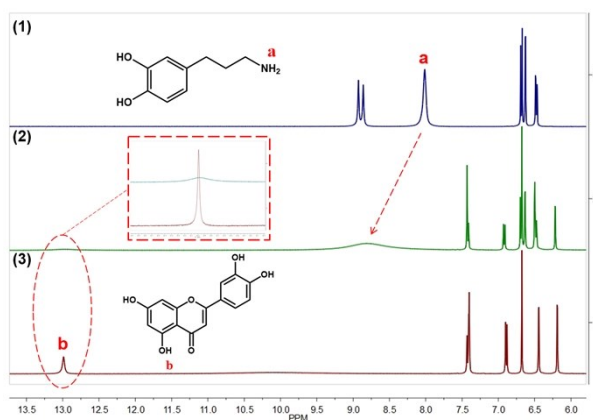

**Fig. S1**  $^1\text{H}$  NMR spectra of DA (1), mixed LTL/DA (2), and LTL (3) in *d*-DMSO.

Furthermore, the FTIR spectra of LTL (a),  $\text{Fe}_3\text{O}_4$ -LTL-MIPs (b), and  $\text{Fe}_3\text{O}_4$ -LTL-MIPs absorbed LTL (c) in  $\text{CHCl}_3$  are given in Fig. S2. Peaks at 3463 and 3436  $\text{cm}^{-1}$  are correspond to the stretching of O-H of LTL and N-H of the PDA layer in  $\text{Fe}_3\text{O}_4$ -LTL-MIPs, respectively. After absorption process, the broad peaks shift to lower frequency region i.e. 3415  $\text{cm}^{-1}$ , signifying the weaken of bonds by additional hydrogen bonding<sup>4</sup>. The

appearance of new carbonyl peak in  $\text{Fe}_3\text{O}_4$ -LTL-MIPs absorbed LTL at lower frequency region  $1608\text{ cm}^{-1}$  along with splitting further indicates that carbonyl takes part in hydrogen bonding interactions<sup>6</sup>.

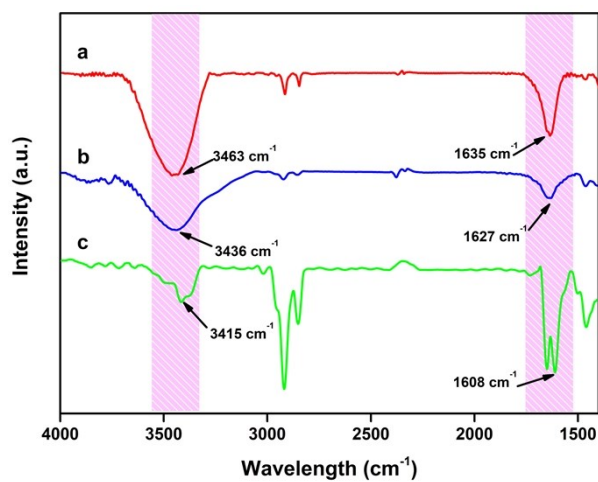

**Fig. S2** FTIR spectra of LTL (a),  $\text{Fe}_3\text{O}_4$ -LTL-MIPs (b), and  $\text{Fe}_3\text{O}_4$ -LTL-MIPs absorbed LTL (c) in  $\text{CHCl}_3$ .

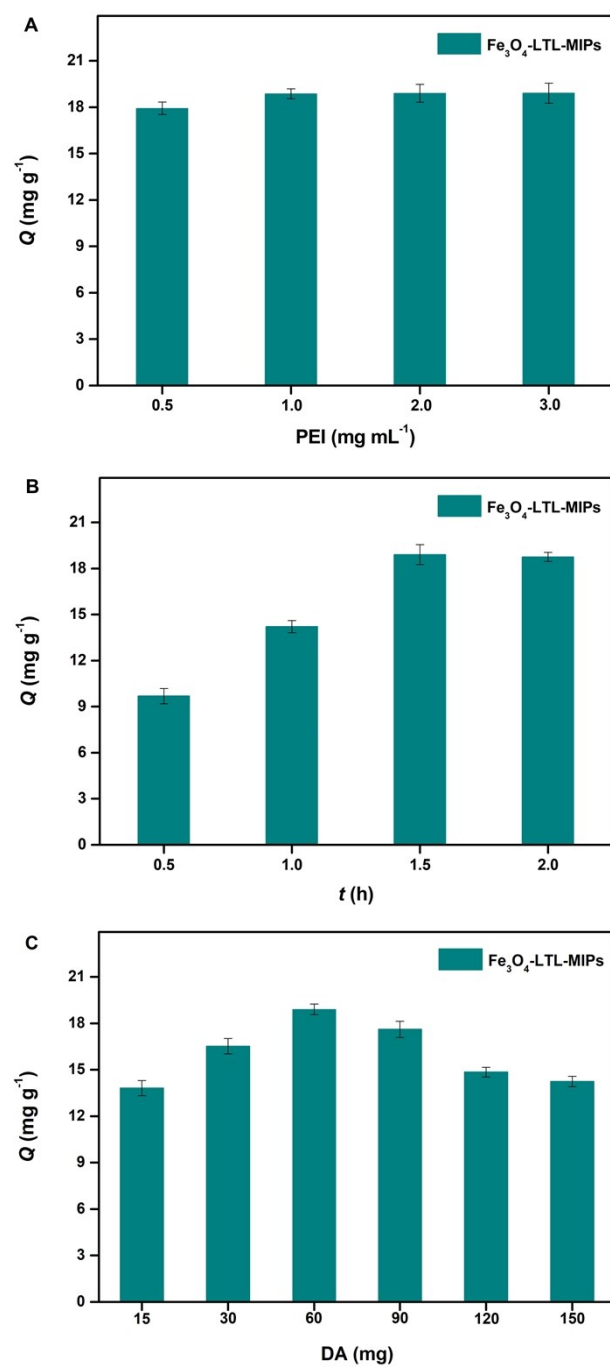

**Fig. S3** Effect of the concentration of PEI (A), the immobilization time (B), and the amount of DA (C) on the absorption performance of  $\text{Fe}_3\text{O}_4\text{-LTL-MIPs}$ .

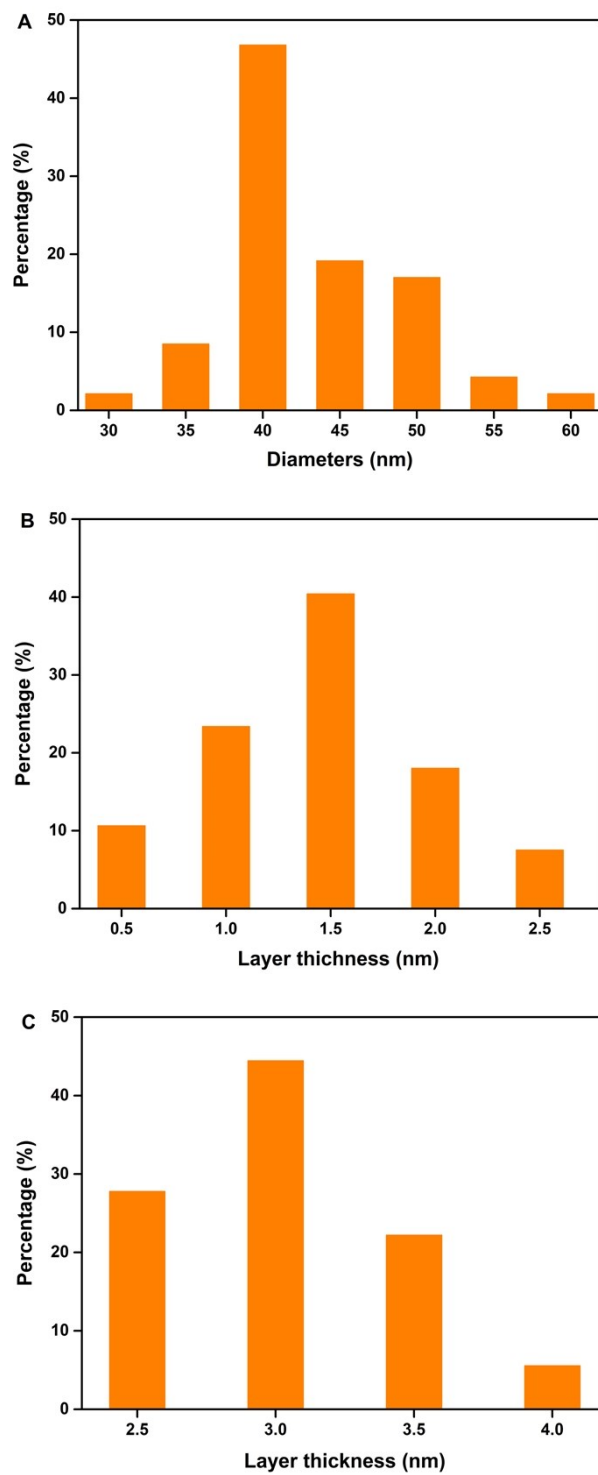

**Fig. S4** The size distribution histogram of  $\text{Fe}_3\text{O}_4\text{-NH}_2$  (A) and the layer thickness distribution of  $\text{Fe}_3\text{O}_4\text{-PEI}$  (B) and  $\text{Fe}_3\text{O}_4\text{-LTL-MIPs}$  (C).

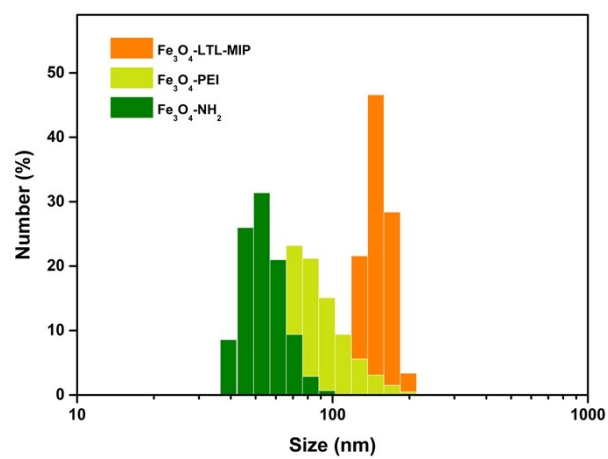

**Fig. S5** DLS of Fe<sub>3</sub>O<sub>4</sub>-NH<sub>2</sub>, Fe<sub>3</sub>O<sub>4</sub>-PEI, and Fe<sub>3</sub>O<sub>4</sub>-LTL-MIPs.

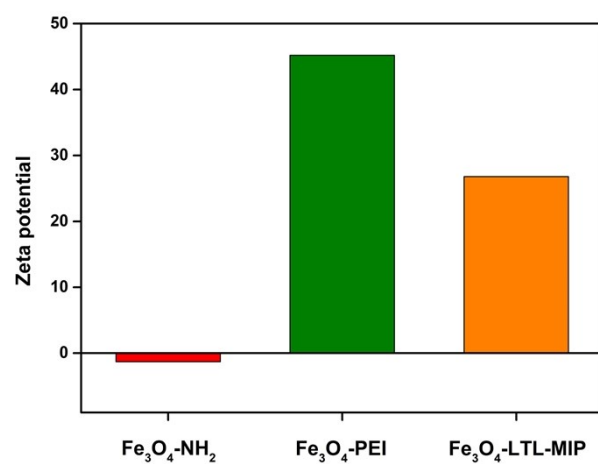

**Fig. S6** The zeta potentials of  $\text{Fe}_3\text{O}_4\text{-NH}_2$ ,  $\text{Fe}_3\text{O}_4\text{-PEI}$ , and  $\text{Fe}_3\text{O}_4\text{-LTL-MIPs}$ .



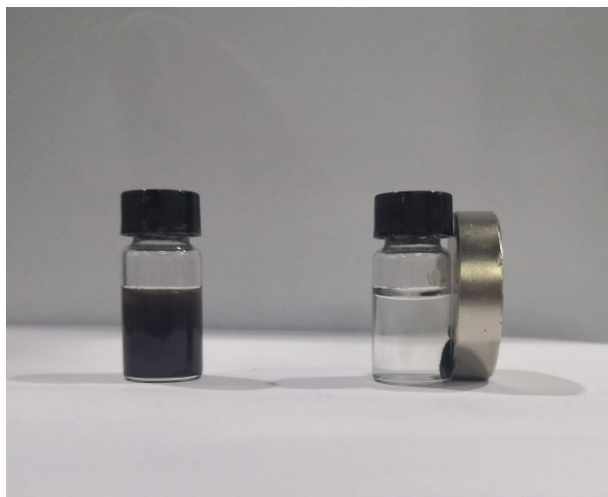

**Fig. S7** The photographic image of the separation process of Fe<sub>3</sub>O<sub>4</sub>-LTL-MIPs with high concentration.

### The XRD patterns of obtained nanomaterials

The XRD patterns of  $\text{Fe}_3\text{O}_4\text{-NH}_2$ ,  $\text{Fe}_3\text{O}_4\text{-PEI}$ , and  $\text{Fe}_3\text{O}_4\text{-LTL-MIPs}$  in Fig. S8 show that six typical diffraction peaks ( $2\theta = 30.15^\circ$ ,  $35.46^\circ$ ,  $43.09^\circ$ ,  $53.61^\circ$ ,  $57.20^\circ$ , and  $62.63^\circ$ ) are all observed. The peak positions at the corresponding  $2\theta$  values are indexed as (220), (311), (400), (422), (511), and (440), respectively. These  $2\theta$  values are in keeping with the database of magnetite in the JCPDS-International Center for Diffraction Data (JCPDS Card: 19-629) file.

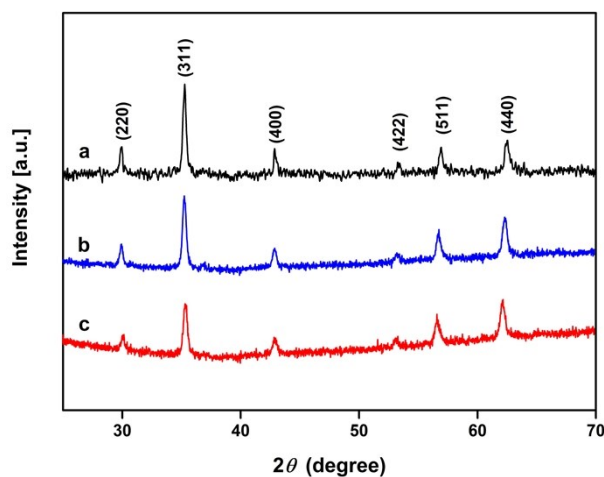

**Fig. S8** XRD patterns of  $\text{Fe}_3\text{O}_4\text{-NH}_2$  (a),  $\text{Fe}_3\text{O}_4\text{-PEI}$  (b), and  $\text{Fe}_3\text{O}_4\text{-LTL-MIPs}$  (c).

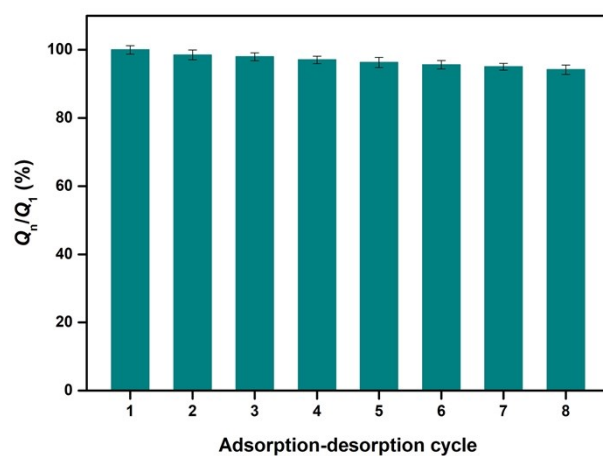

**Fig. S9** Reusability of Fe<sub>3</sub>O<sub>4</sub>-LTL-MIPs.

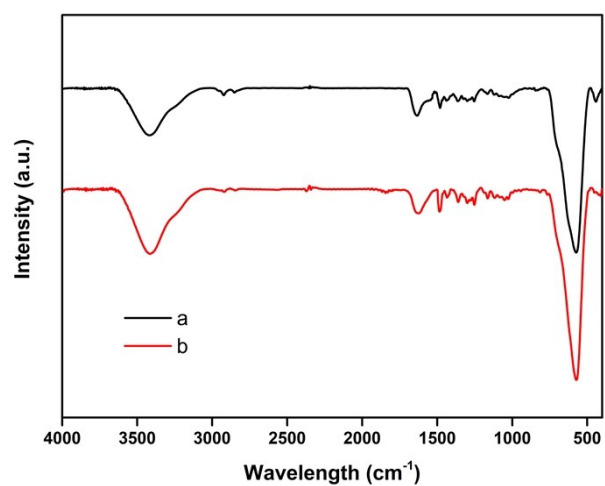

**Fig. S10** FTIR spectra of Fe<sub>3</sub>O<sub>4</sub>-LTL-MIPs before (a) and after (b) the adsorption-desorption experiment.

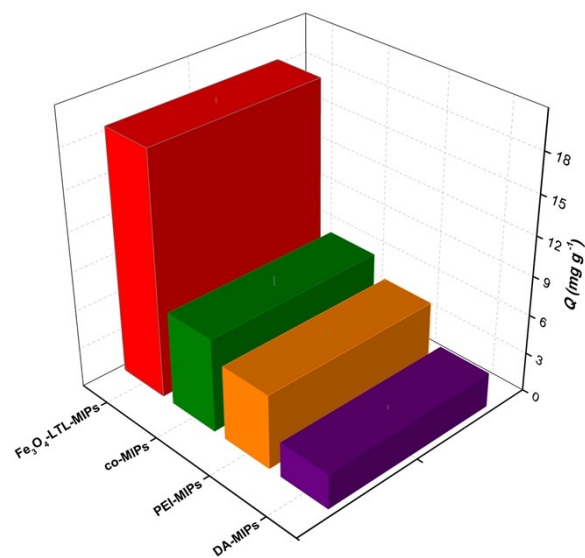

**Fig. S11** The adsorption ability of Fe<sub>3</sub>O<sub>4</sub>-LTL-MIPs, co-MIPs, PEI-MIPs, and DA-MIPs in LTL solutions.

**Table S1** Equations and parameters for the pseudo-first-order and pseudo-second-order kinetic models of Fe<sub>3</sub>O<sub>4</sub>-LTL-MIPs and Fe<sub>3</sub>O<sub>4</sub>-NIPs for LTL.

| Model               | Equations<br>parameters                         | Fe <sub>3</sub> O <sub>4</sub> -LTL-MIPs | Fe <sub>3</sub> O <sub>4</sub> -NIPs   |
|---------------------|-------------------------------------------------|------------------------------------------|----------------------------------------|
| pseudo-first-order  | Equation                                        | $\ln (19.0 - Q_t) = \ln 19.0 - 1.688t$   | $\ln (4.95 - Q_t) = \ln 4.95 - 1.582t$ |
|                     | $Q_{e,f}^a$ (mg g <sup>-1</sup> )               | 19.0                                     | 4.95                                   |
|                     | $k_1$ (min <sup>-1</sup> )                      | 1.69                                     | 1.58                                   |
|                     | $R^2$                                           | 0.960                                    | 0.927                                  |
| pseudo-second-order | Equation                                        | $t / Q_t = 0.0517t + 0.0077$             | $t / Q_t = 0.2023t + 0.0201$           |
|                     | $Q_{e,s}^b$ (mg g <sup>-1</sup> )               | 19.34                                    | 4.94                                   |
|                     | $k_2$ (g mg <sup>-1</sup> min <sup>-1</sup> )   | 0.35                                     | 2.04                                   |
|                     | $\nu_0$ (mg g <sup>-1</sup> min <sup>-1</sup> ) | 129.9                                    | 49.75                                  |
|                     | $R^2$                                           | 0.999                                    | 0.996                                  |

<sup>a</sup>  $Q_{e,f}$  (mg g<sup>-1</sup>) is the calculated value of  $Q_e$  by pseudo-first-order equation.

<sup>b</sup>  $Q_{e,s}$  (mg g<sup>-1</sup>) is the calculated value of  $Q_e$  by pseudo-second-order equation.

**Table S2** Equations and parameters for the *Langmuir* and *Freundlich* isotherm models of Fe<sub>3</sub>O<sub>4</sub>-LTL-MIPs and Fe<sub>3</sub>O<sub>4</sub>-NIPs for LTL.

| Isotherm model                | Equations and parameters          | Fe <sub>3</sub> O <sub>4</sub> -LTL-MIPs | Fe <sub>3</sub> O <sub>4</sub> -NIPs |
|-------------------------------|-----------------------------------|------------------------------------------|--------------------------------------|
| <i>Langmuir</i><br>isotherm   | Equation                          | $C_e / Q_e = 0.0435C_e + 1.0291$         | $C_e / Q_e = 0.1511C_e + 5.1271$     |
|                               | $K_L$ (mL mg <sup>-1</sup> )      | 42.27                                    | 29.46                                |
|                               | $Q_{m,L}^a$ (mg g <sup>-1</sup> ) | 22.99                                    | 6.62                                 |
|                               | $R^2$                             | 0.994                                    | 0.993                                |
| <i>Freundlich</i><br>isotherm | Equation                          | $\log Q = 0.3463 \log C_e + 0.5843$      | $\log Q = 0.5202 \log C_e + 0.3329$  |
|                               | $K_F$ (mg g <sup>-1</sup> )       | 3.84                                     | 0.46                                 |
|                               | $m$                               | 0.35                                     | 0.52                                 |
|                               | $R^2$                             | 0.956                                    | 0.928                                |

<sup>a</sup>  $Q_{m,L}$  (mg g<sup>-1</sup>) is the caculated value of  $Q_e$  by Langumuir isotherm equation.

**Table S3** Selectivity adsorption parameters of Fe<sub>3</sub>O<sub>4</sub>-LTL-MIP and Fe<sub>3</sub>O<sub>4</sub>-NIP for LTL.

| Analytes | $Q_{MIP}$ ( $\mu\text{mol g}^{-1}$ ) | $Q_{NIP}$ ( $\mu\text{mol g}^{-1}$ ) | $IF$ | $SC$ |
|----------|--------------------------------------|--------------------------------------|------|------|
| LTL      | 66.03                                | 16.74                                | 3.94 | -    |
| QU       | 22.71                                | 15.22                                | 1.49 | 2.64 |
| RT       | 7.90                                 | 3.99                                 | 1.98 | 1.99 |
| CA       | 15.37                                | 4.62                                 | 3.33 | 1.18 |
| CH       | 8.04                                 | 2.23                                 | 3.61 | 1.09 |



**Table S4** Reproducibility of Fe<sub>3</sub>O<sub>4</sub>-LTL-MIPs.

| Nanomaterials                        | Batch                   | 1     | 2     | 3     | 4     | 5     | 6     | 7     | 8     | Average |
|--------------------------------------|-------------------------|-------|-------|-------|-------|-------|-------|-------|-------|---------|
| Fe <sub>3</sub> O <sub>4</sub> -LTL- | Q (mg g <sup>-1</sup> ) | 18.64 | 19.29 | 18.48 | 18.93 | 19.04 | 18.87 | 18.45 | 18.80 | 18.81   |
| MIPs                                 | RSD (%)                 | 5.2   | 3.3   | 4.7   | 4.0   | 3.7   | 4.1   | 3.8   | 4.3   | 1.5     |

## References

1. Z. Dong, J. Zeng, H. Zhou, C. Lv, Y. Ma and J. Zeng, *J. Chem. Technol. Biotechnol.*, 2019, **94**, 942-954.
2. M. Vatankhah-Varnoosfaderani, S. Hashmi, A. GhavamiNejad and F. J. Stadler, *Polym. Chem.*, 2014, **5**, 512-523.
3. X. Ni, S. Rahman, S. Wang, C. Jin, X. Zeng, D. L. Hughes, C. Redshaw and T. Yamato, *Org. Biomol. Chem.*, 2012, **10**, 4618-4626.
4. T. Senthilkumar, F. Lv, H. Zhao, L. Liu and S. Wang, *ACS Appl. Bio Mater.*, 2019, **2**, 6012-6020.
5. S. Lee, J. Kim, H. Song, J. Seok, S. Hong and Y. Boo, *Antioxidants*, 2019, **8**, 87-98.
6. I. S. Ryu, X. Liu, Y. Jin, J. Sun and Y. J. Lee, *RSC Adv.*, 2018, **8**, 23481-23488.
